# Supplementary material
Source: MDPI journal article supplement (https://www.mdpi.com/2075-163X/9/2/114)
Supplement: s1 [file s1]

# A pXRF In Situ Study of 16th–17th Century Fresco Paints from Sviyazhsk (Tatarstan Republic, Russian Federation)

Rezida Khramchenkova <sup>1,2</sup>, Corina Ionescu <sup>2,3,\*</sup>, Airat Sitdikov <sup>1,2,4</sup>, Polina Kaplan <sup>1,2</sup>, Ágnes Gál <sup>3</sup> and Bulat Gareev <sup>1</sup>

<sup>1</sup> Analytical and Restoration Department, Institute of Archaeology of Tatarstan Academy of Science, 30, Butlerova St., 420012 Kazan, Tatarstan, Russia; rkhranch@gmail.com (R.K.); sitdikov\_a@mail.ru (A.S.); poljashka39@yandex.ru (P.K.); bulat@gareev.net (B.G.)

<sup>2</sup> Archeotechnologies & Archeological Material Sciences Laboratory, Institute of International Relations, History and Oriental Studies, Kazan (Volga Region) Federal University, 18 Kremlevskaya Str., 420000 Kazan, Tatarstan, Russia

<sup>3</sup> Department of Geology, Babeş-Bolyai University, 1 Kogălniceanu Str., 400084 Cluj-Napoca, Romania; agi.gal@ubbcluj.ro

<sup>4</sup> Laboratory of Isotope and Element Analysis, Institute of Geology and Petroleum Technologies, Kazan (Volga Region) Federal University, 18 Kremlevskaya Str., 420000 Kazan, Tatarstan, Russia

\* Correspondence: corina.ionescu@ubbcluj.ro

Received: 13 December 2018; Accepted: 13 February 2019; Published: 15 February 2019

**Table 1.** Mineralogy and chemistry of pigments (alphabetically ordered) discussed in the text. Mineral names and composition according to IMA List of Minerals [40].

| Pigment                      | Main Mineral Components          | Main Chemistry                                                                                | Colour               |
|------------------------------|----------------------------------|-----------------------------------------------------------------------------------------------|----------------------|
| Antimony ochre               | Stibiconite + Cervantite         | $\text{Sb}_2\text{O}_3(\text{OH}) + \text{Sb}_2\text{O}_4$                                    | White, grey, yellow  |
| Antimony white               | Senarmontite                     | $\text{Sb}_2\text{O}_3$                                                                       | White, grey          |
| Arsenic                      | Arsenic                          | As                                                                                            | Dark grey, grey      |
| Arsenolite                   | Arsenolite                       | $\text{As}_2\text{O}_3$                                                                       | White                |
| Azurite ('Mountain blue')    | Azurite                          | $\text{Cu}_3(\text{CO}_3)_2(\text{OH})_2$                                                     | Blue                 |
| Black lead                   | Plattnerite                      | $\text{PbO}_2$                                                                                | Black                |
| Black powder                 | Magnetite                        | $\text{Fe}_3\text{O}_4$                                                                       | Black, grey          |
| Blue lead                    | Galena                           | PbS                                                                                           | Grey, bluish black   |
| Blue ochre ('Blue Fe oxide') | Vivianite                        | $\text{Fe}_3(\text{PO}_4)_2 \cdot 8\text{H}_2\text{O}$                                        | Blue, grey           |
| Bone black                   | Calcite + Apatite + Graphite     | $\text{CaCO}_3 + \text{Ca}_5(\text{PO}_4)_3(\text{F},\text{OH}) + \text{C}$                   | Black, grey          |
| Bone white                   | Calcite + Apatite                | $\text{CaCO}_3 + \text{Ca}_5(\text{PO}_4)_3(\text{F},\text{OH})$                              | White, grey          |
| Brown ochre ('umber')        | Goethite + Pyrolusite            | $\text{FeO}(\text{OH}) + \text{MnO}_2$                                                        | Brown, reddish brown |
| Burned umber                 | Hematite + Goethite + Pyrolusite | $\text{Fe}_2\text{O}_3 + \text{FeO}(\text{OH}) + \text{MnO}_2$                                | Reddish brown        |
| Chrysocolla                  | Chrysocolla                      | $(\text{Cu},\text{Al})\text{H}_2\text{Si}_2\text{O}_5(\text{OH})_4 \cdot n\text{H}_2\text{O}$ | Blue, bluish green   |
| Egyptian blue                | Synthetic cuprorivaite           | $\text{CaCuSi}_4\text{O}_{10}$                                                                | Deep blue            |
| Green earth                  | Celadonite                       | $\text{KMgFeSi}_4\text{O}_{10}(\text{OH})_2$                                                  | Green                |

|                                   |                                   |                                            |                                         |
|-----------------------------------|-----------------------------------|--------------------------------------------|-----------------------------------------|
| Green earth                       | Glauconite                        | $(K,Na)(Mg,Fe)(Al)Si_4O_{10}(OH)_2$        | Green                                   |
| Lapis lazuli ('ultramarine blue') | Lazurite                          | $Na_3Ca(Si_3Al_3)O_{12}S$                  | Deep blue                               |
| Lead white (Leadwhite)            | Anglesite                         | $PbSO_4$                                   | White, blue, light grey                 |
| Lead white (Leadwhite)            | Cerussite                         | $PbCO_3$                                   | White, grey, blue                       |
| Lead white (Leadwhite)            | Hydrocerussite + Cerussite        | $Pb_3(CO_3)_2(OH)_2 + PbCO_3$              | White                                   |
| Lime white (slaked lime)          | Portlandite                       | $Ca(OH)_2$                                 | White                                   |
| Malachite                         | Malachite                         | $Cu_2(CO_3)(OH)_2$                         | Green                                   |
| Naples yellow                     | Bindheimite                       | $Pb_2Sb_2O_7$                              | Yellow                                  |
| Red arsenic                       | Realgar                           | $AsS$                                      | Reddish orange                          |
| Red lead                          | Litharge                          | $PbO$                                      | Red, dark red                           |
| Red lead                          | Minium                            | $Pb_3O_4$                                  | Red                                     |
| Red ochre                         | Hematite                          | $Fe_2O_3$                                  | Red                                     |
| Sienna                            | Goethite ± Lepidocrocite          | $FeO(OH)$                                  | Brownish yellow                         |
| Stibnite ('antimony')             | Stibnite                          | $Sb_2S_3$                                  | Grey, dark grey, black                  |
| Verdigris                         | Copper acetate + Copper hydroxide | $[Cu(CH_3COO)_2]_2 + Cu(OH)_2 \cdot 5H_2O$ | Bluish green                            |
| Yellow arsenic                    | Orpiment                          | $As_2S_3$                                  | Yellow                                  |
| Yellow lead                       | Massicot                          | $PbO$                                      | Yellow, reddish yellow, brownish yellow |
| Yellow ochre                      | Goethite ± Lepidocrocite          | $FeO(OH)$                                  | Yellow                                  |

**Table 2.** List of the frescoes studied and their location in the church. Abbreviation: Fr# = Fresco number.

| Fr# | Description                                                    | Location                         |
|-----|----------------------------------------------------------------|----------------------------------|
| 1   | ‘Assumption of the Mother of God’                              | Altar                            |
| 2   | ‘Bishop Isaiah of Rostov’                                      | Altar                            |
| 3   | Title in the center of the altar                               | Center of the altar              |
| 4   | Towel* in the center of the altar                              | Center of the altar              |
| 7   | Archangels                                                     | Drum**                           |
| 8   | ‘God had a rest in the seventh day’                            | Prayer hall                      |
| 9   | Joint composition ‘Creation of animals’ and ‘Creation of Adam’ | Prayer hall                      |
| 10  | ‘Ascension of the Mother of God’                               | Prayer hall                      |
| 12  | ‘Our Lady of the Sign’                                         | Prayer hall                      |
| 13  | ‘Apostle Philip of the Seventy’                                | Altar (lower part of the pillar) |
| 14  | ‘Apostle Philip of the Seventy’                                | Altar (lower part of the pillar) |
| 15  | Joint composition ‘Creation of stars’ and ‘Blessing of water’  | Prayer hall                      |
| 16  | ‘Evangelist Matthew’                                           | Prayer hall                      |
| 17  | Paint around window aperture (16 <sup>th</sup> c.)             | Drum**                           |
| 18  | Paint around the window aperture (18 <sup>th</sup> c.)         | Drum**                           |
| 23  | Early windows                                                  | Drum**                           |
| 24  | Towel*                                                         | Sacristy                         |
| 25  | Title                                                          | Drum**                           |
| 26  | Various images                                                 | Former exterior western wall     |
| 27  | Various images                                                 | Former exterior western wall     |

NOTE: \* Towel is the decoration motive running at the bottom along the walls; \*\*Drum is the cylinder-shaped room under the dome in the Orthodox cathedrals.
