# Supplementary material
Source: MDPI journal article supplement (https://www.mdpi.com/2075-163X/9/2/114)
Supplement: s1 [file s1]

# A pXRF In Situ Study of 16th–17th Century Fresco Paints from Sviyazhsk (Tatarstan Republic, Russian Federation)

Rezida Khranchenkova <sup>1,2</sup>, Corina Ionescu <sup>2,3,\*</sup>, Airat Sitdikov <sup>1,2,4</sup>, Polina Kaplan <sup>1,2</sup>, Ágnes Gál <sup>3</sup> and Bulat Gareev <sup>1</sup>

<sup>1</sup> Analytical and Restoration Department, Institute of Archaeology of Tatarstan Academy of Science, 30, Butlerova St., 420012 Kazan, Tatarstan, Russia; rkhranch@gmail.com (R.K.); sitdikov\_a@mail.ru (A.S.); poljashka39@yandex.ru (P.K.); bulat@gareev.net (B.G.)

<sup>2</sup> Archeotechnologies & Archeological Material Sciences Laboratory, Institute of International Relations, History and Oriental Studies, Kazan (Volga Region) Federal University, 18 Kremlevskaya Str., 420000 Kazan, Tatarstan, Russia

<sup>3</sup> Department of Geology, Babeş-Bolyai University, 1 Kogălniceanu Str., 400084 Cluj-Napoca, Romania; agi.gal@ubbcluj.ro

<sup>4</sup> Laboratory of Isotope and Element Analysis, Institute of Geology and Petroleum Technologies, Kazan (Volga Region) Federal University, 18 Kremlevskaya Str., 420000 Kazan, Tatarstan, Russia

\* Correspondence: corina.ionescu@ubbcluj.ro

Received: 13 December 2018; Accepted: 13 February 2019; Published: 15 February 2019

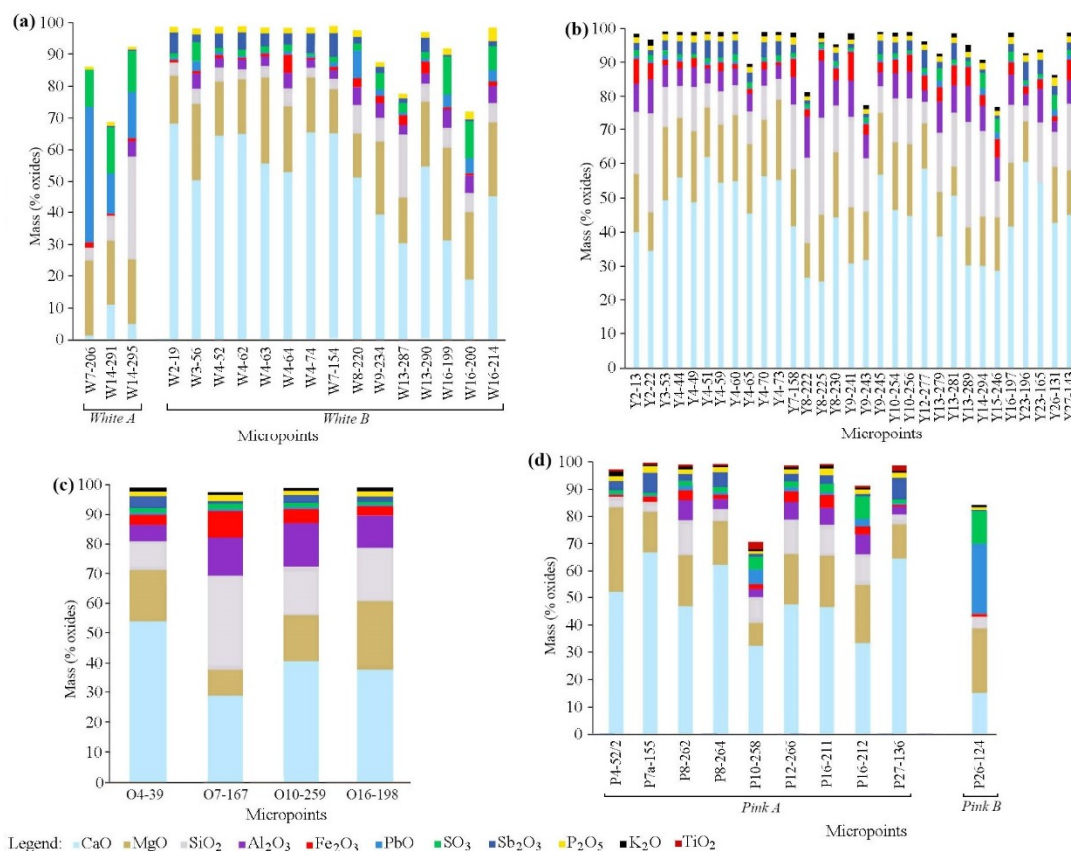

**Figure 1.** Charts showing the distribution and the weight of main oxides (in mass %) in the white (a), yellow (b), orange (c) and pink (d) paints. The charts show the chemical grouping within the white and pink colors.

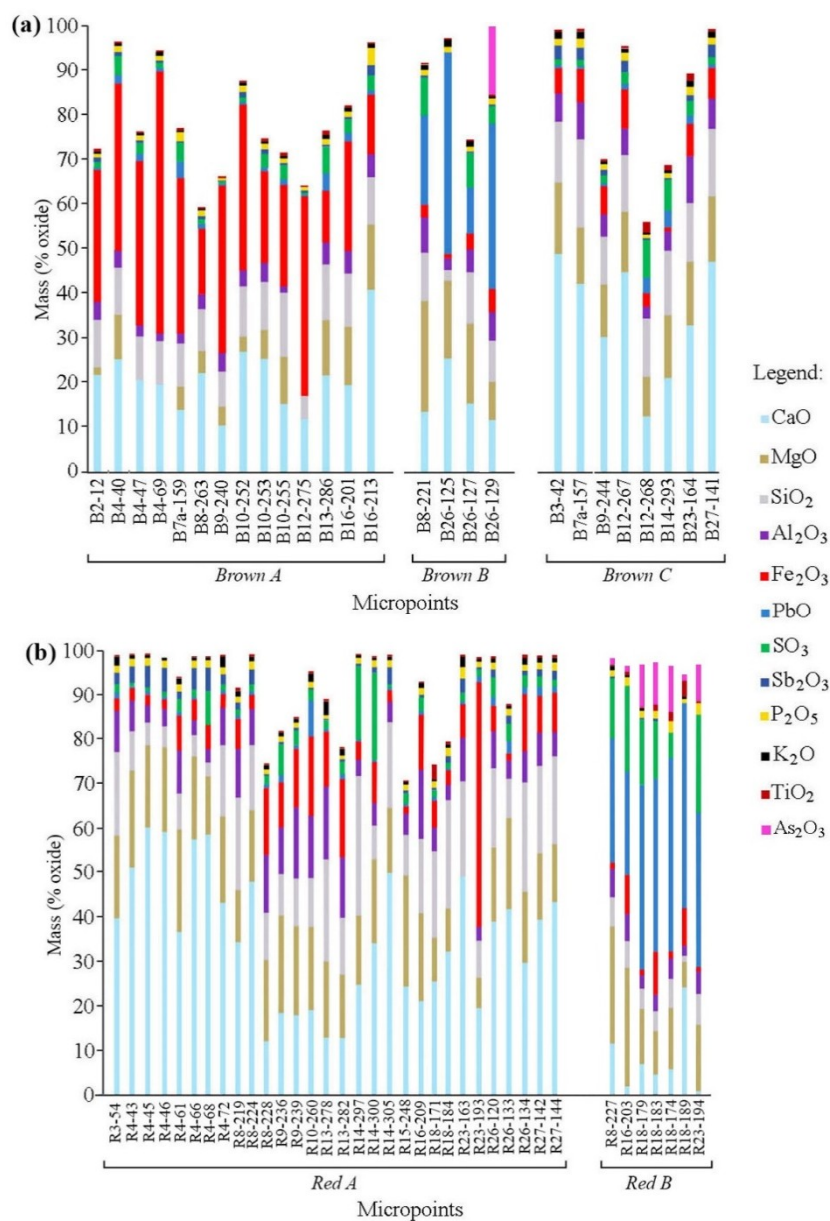

**Figure 2.** Charts showing the distribution and the weight of main oxides (in mass %) in the brown (a) and red (b) paints. The charts show the grouping within the brown and red colors.

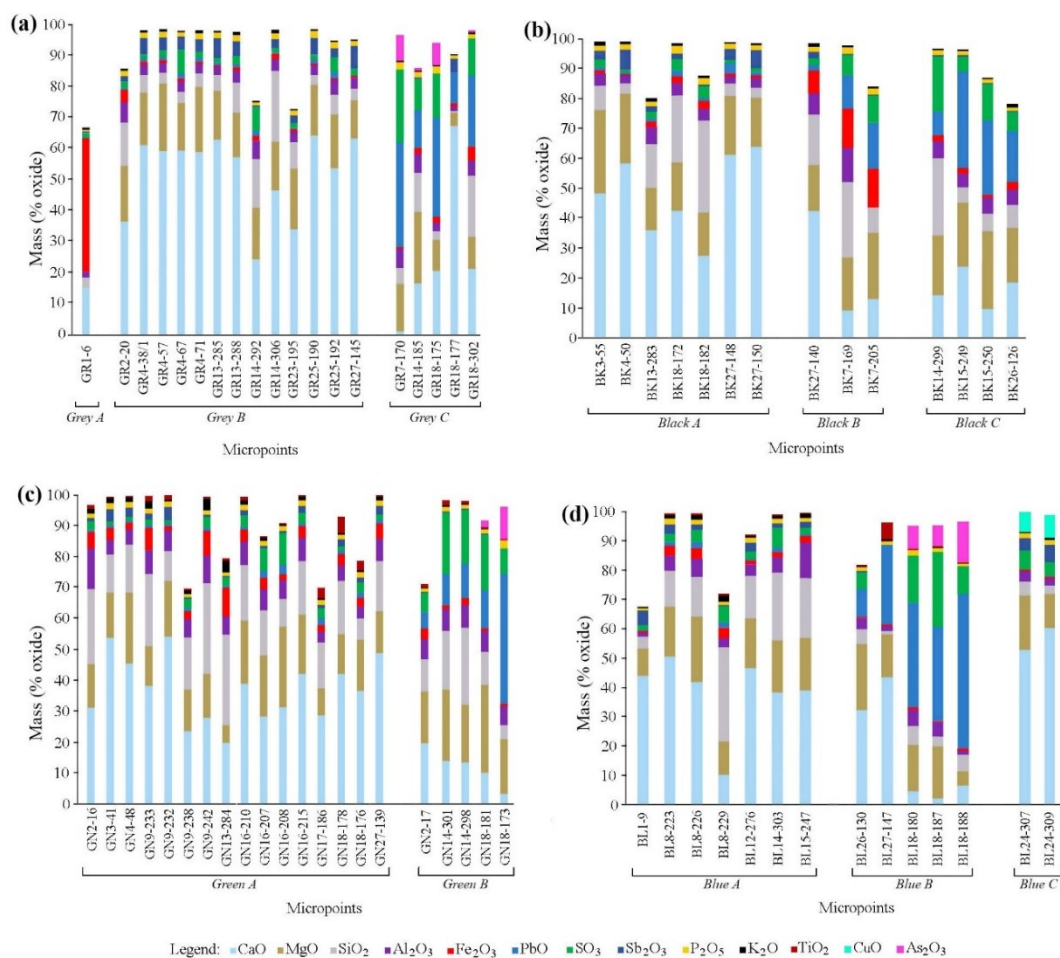

**Figure 3.** Charts showing the distribution and the weight of main oxides (in mass %) in the grey (a), black (b), green (c) and blue (d) paints. The charts show the grouping within the grey, black, green and blue colors.
